# Supplementary material for: Ultrahigh sensitivity in the amorphous ZnSnO UV photodetector
Source: Royal Society of Chemistry journal article supplement (doi:10.1039/c6ra02924h), 2016-01-01
Supplement: c6ra02924h1.pdf [file c6ra02924h1.pdf]

## Supporting Information

### Ultrahigh Sensitivity in Amorphous ZnSnO UV Photodetector

Authors: Weihao Wang, Xinhua Pan\*, Wen Dai, Yiyu Zeng and Zhizhen Ye

State Key Laboratory of Silicon Materials, Cyrus Tang Center for Sensor Materials and Applications, School of Materials Science and Engineering, Zhejiang University, Hangzhou 310027, People's Republic of China

#### Output characteristics

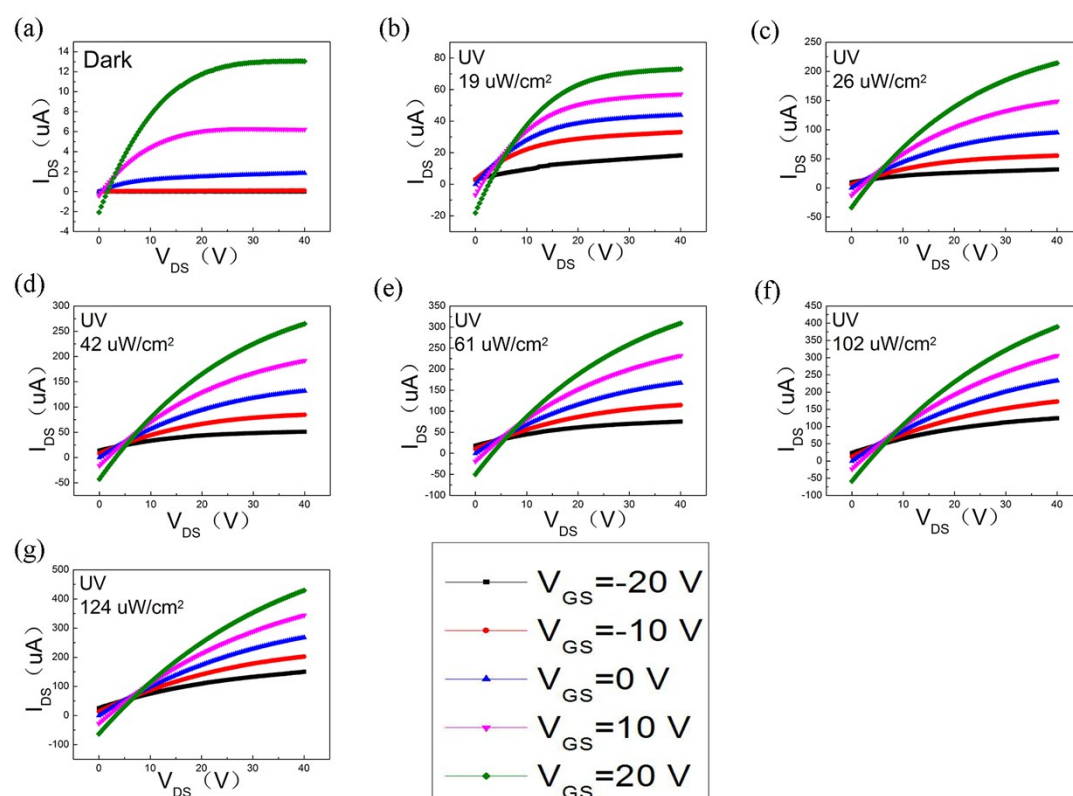

**Fig. S1** Output characteristics curves of ZTO photodetector under dark and different UV intensities

## Absorption spectrum

From Fig. S2, there is nearly no absorption during the visible light. The increase of absorbance starts from 375 nm. Nevertheless, the figure has proved that the device is visible blind and wavelength sensitive.

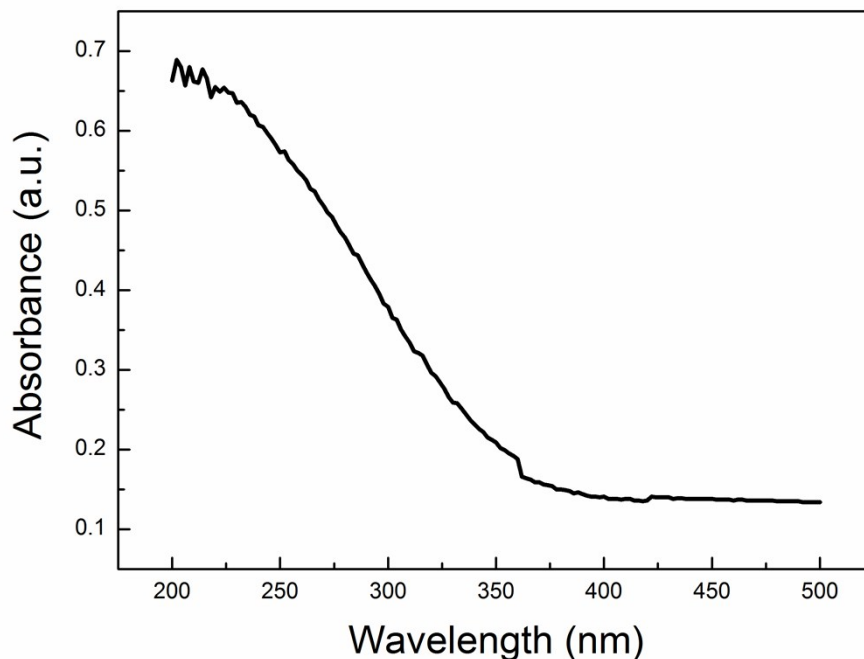

**Fig. S2** The absorption spectrum of ZTO

## Stability/ageing data

The device was exposed in the ambient environment for 8 months and retested. The basic TFTs performance nearly has no change. From Fig. S3a,  $I_{\text{dark}}$  keeps the  $10^{-9}$  A order. After illuminated by the UV ( $P = 26 \mu\text{W}/\text{cm}^2$ ),  $I_{\text{photo}}$  increases to  $10^{-5}$  A. The sensitivity is calculated to be  $10^4$ , which confirms that our device has good stability. From Fig. S3b, the response becomes a bit slower in an acceptable range. Note that  $\tau_g$  and  $\tau_d$  are 5.90 s and 5.78 s, respectively.

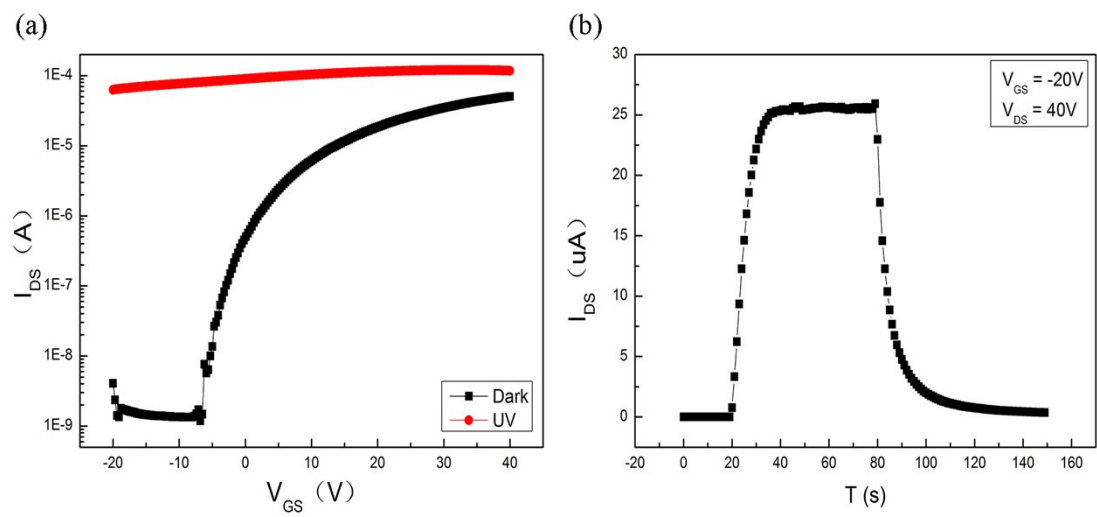

**Fig. S3** The performance of ZTO photodetector exposed in ambient environment for 8 months
